# Supplementary material for: A homozygous loss‐of‐function mutation in PDE2A associated to early‐onset hereditary chorea
Source: PubMed Central journal article supplement (PMC5873427; doi:10.1002/mds.27286), 2018-02-02
Supplement: MDS-33-482-s002.pdf [file MDS-33-482-s002.pdf]

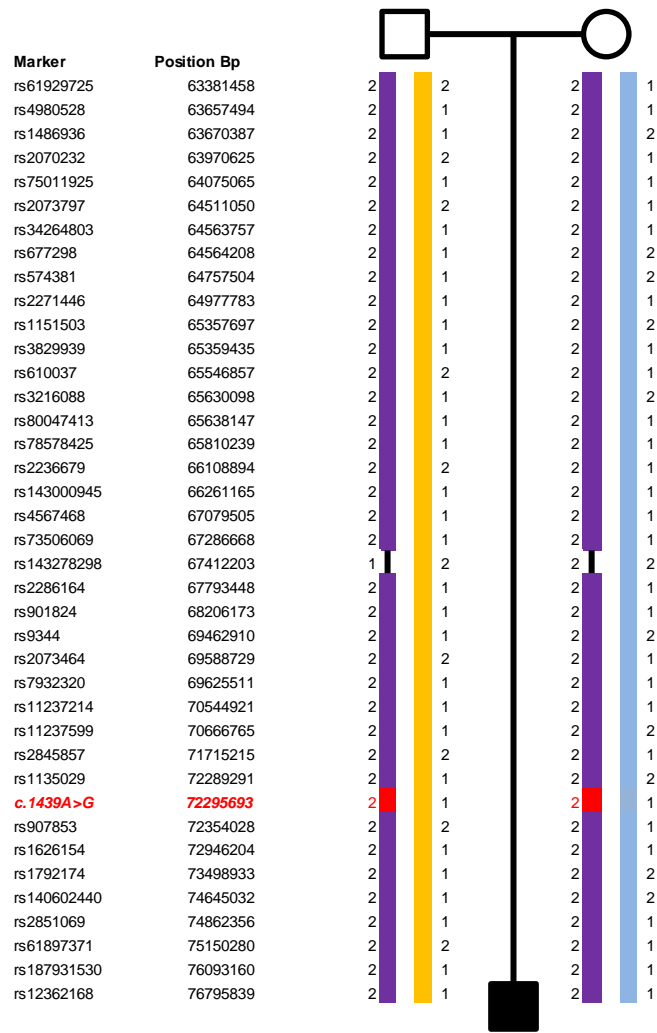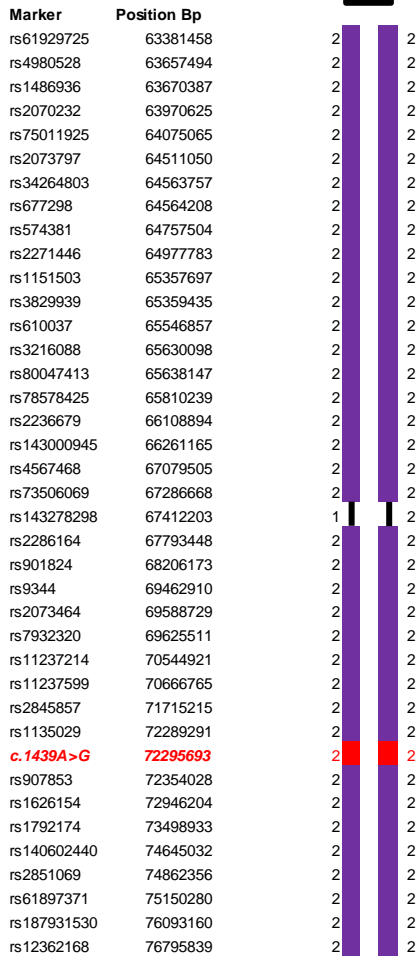

**Supplementary Figure 1.** Haplotype analysis for the region on chromosome 11 surrounding *PDE2A* c.1439A>G (indicated in red), with markers and their positions (Bp) displayed on the left.
